# Supplementary material for: Efficient correction of ABCA4 variants by CRISPR-Cas9 in hiPSCs derived from Stargardt disease patients
Source: PubMed Central journal article supplement — Mol Ther Nucleic Acids. 2023 Mar 3;32:64–79. doi: 10.1016/j.omtn.2023.02.032 (PMC10034418; doi:10.1016/j.omtn.2023.02.032), 2023-03-03
Supplement: mmc1.pdf [file mmc1.pdf]

OMTN, Volume 32

## Supplemental information

### **Efficient correction of *ABCA4* variants by CRISPR-Cas9 in hiPSCs derived from Stargardt disease patients**

**Laura Siles, Sheila Ruiz-Nogales, Arnau Navinés-Ferrer, Pilar Méndez-Vendrell, and Esther Pomares**

## Figure S1

**A**

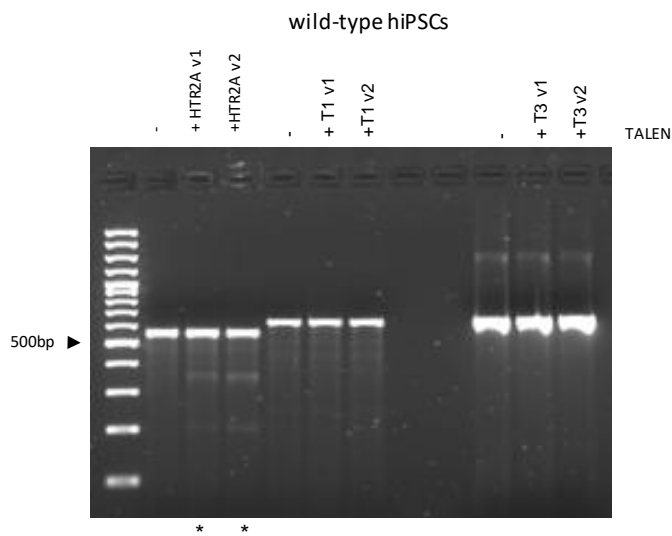

**B**

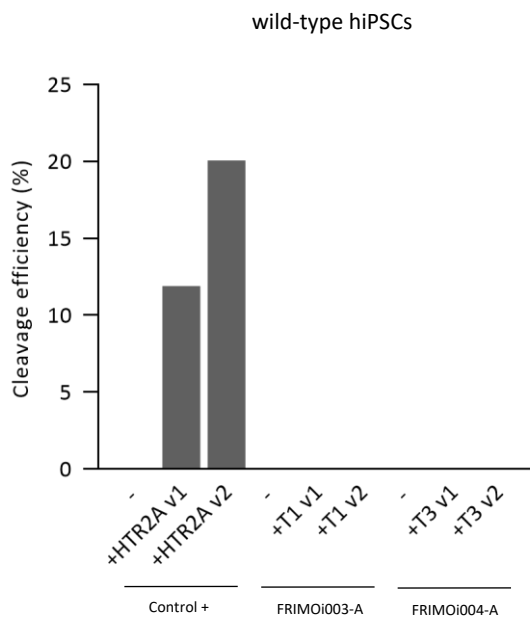

**Figure S1. No DNA cleavage achieved by TALEN technology to target *ABCA4* pathogenic variants.** (A) PCR products after genomic cleavage detection assay resolved on a 2% agarose gel. Asterisks show gel lanes with expected fragments resulting from T7E1 cutting. Untreated genomic DNA from same wild-type hiPSCs used for transfections was used as a negative control, showing the uncleaved parental band. Two different electroporation conditions were used for each TALEN pair (referred as v1 and v2). (B) Band intensity quantification of gel in (A).

## Figure S2

**A**

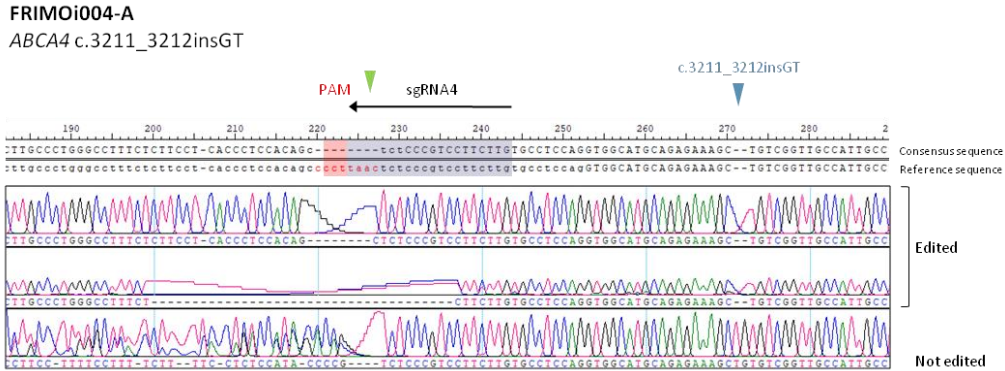

**B**

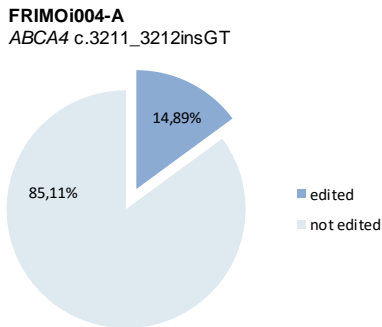

**C**

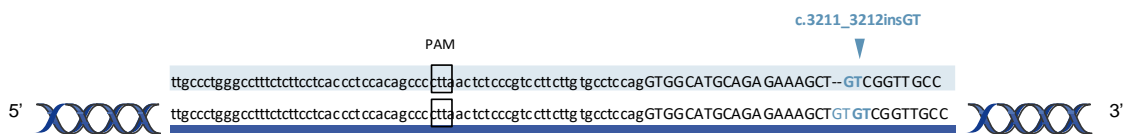

**Figure S2. CRISPR/Cas9-mediated gene editing could result in genomic aberrations before experimental design optimization.** (A) Representative captures of chromatograms showing Sanger sequencing reads (with reverse primers) of PCR products from *ABCA4* specific locus. On top are consensus and reference sequences and below examples of edited and not edited clones. Highlighted are the sgRNA and PAM motif (in red). Green arrowhead point out predicted DNA cut site. Small and large deletions appear near PAM and cut site. (B) Pie chart of the percentage of edited and not edited clones according to variant correction in FRIMOi004-A hiPSCs. (C) ssODN design for CRISPR/Cas9-mediated gene editing for FRIMOi004-A hiPSC correction before assay optimization. Note that PAM was not modified.

**Figure S3**

**A**

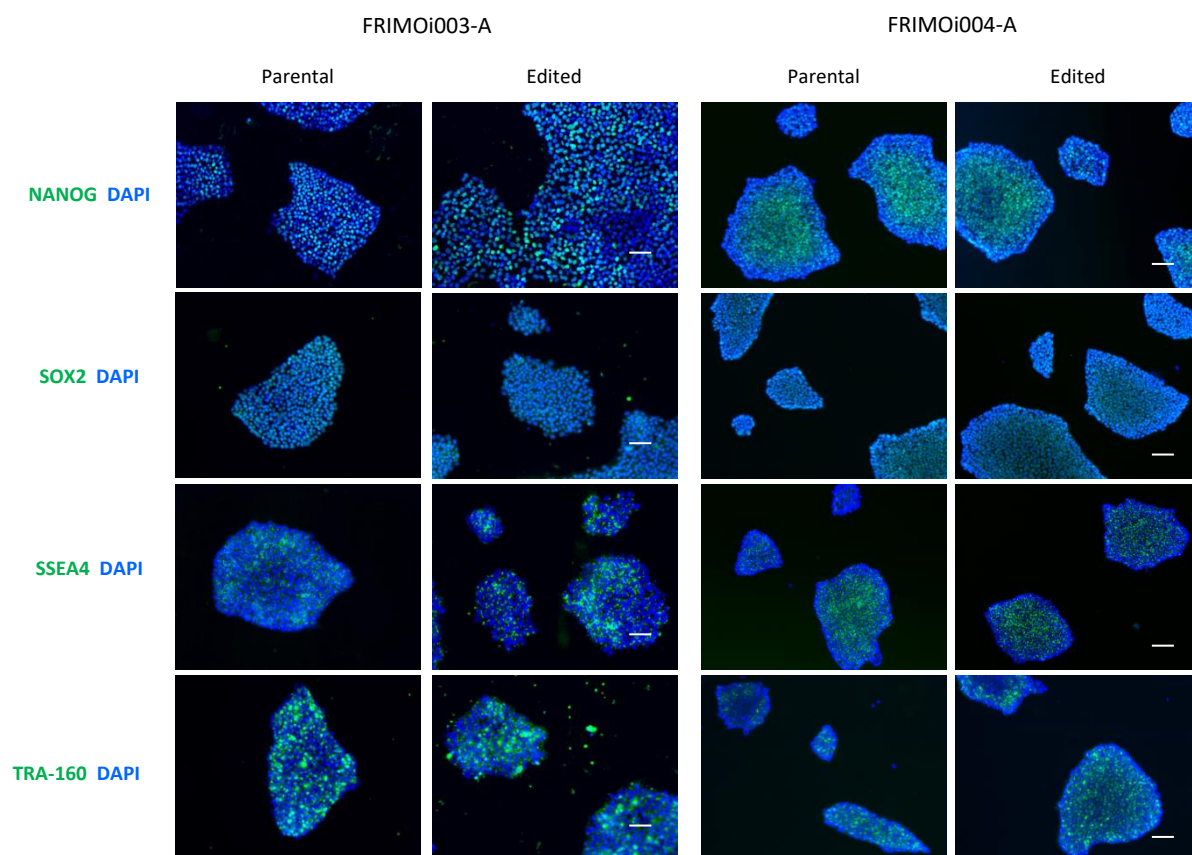

**B**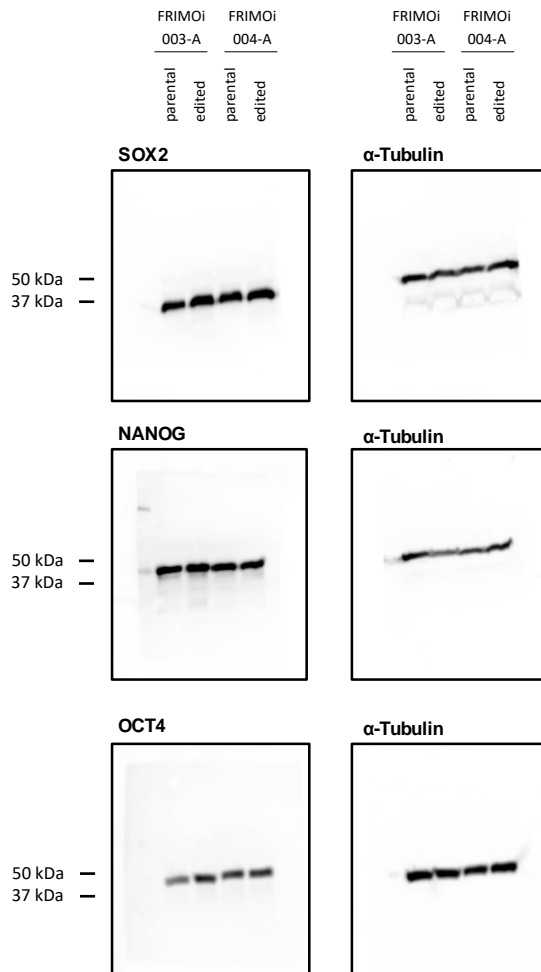**C**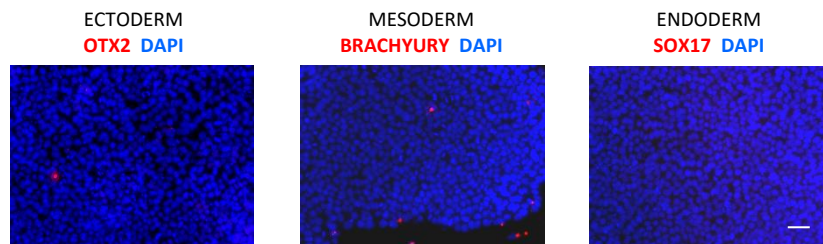

**Figure S3. hiPSC clones preserve the expression of pluripotency markers after gene editing.** (A) Immunofluorescence pictures of pluripotency markers NANOG, SOX2, SSEA4 and TRA-160 counterstained with DAPI in parental and edited clones colonies in FRIMOi003-A and FRIMOi004-A. Representative images are shown. Scale bar represents 100  $\mu$ m. (B) Full unedited blots for Figure 4E. (C) As in Figure 4F, immunofluorescence pictures of lineage markers OTX2, BRACHYURY and SOX17 counterstained with DAPI in edited hiPSCs not subjected to the differentiation protocol. Representative images are shown. Scale bar represents 50  $\mu$ m.

**Table S1.** List of primers used for genotyping each *ABCA4* locus depending on the sgRNA and TALEN.

| <b>Variant</b>                        | <b>Sequence ID</b> | <b>Forward</b>       | <b>Reverse</b>       |
|---------------------------------------|--------------------|----------------------|----------------------|
| c.4253+4C>T                           | 1                  | CTTGGGATGGCGCTAGCTCT | AAGCCCAACCCTCTCCACCA |
|                                       | 2                  | AAGCCCAACCCTCTCCACCA | ATGCTGCCTTGGGATGGCGC |
|                                       | T1                 | CCCTGGATATATGGGCAGCA | AGTGGTCTGATGGCATGTCA |
| c.6089G>A p.Arg2030Gln                | 3                  | GGTAACTCCAGCATTTTGC  | TTCCTTTTCCCGTTGGCA   |
|                                       | T2                 | CCCATGCATTTCTGAAGCCA | ACTCCTATGTGGCCACAACA |
| c.3211_3212insGT<br>p.Ser1071Cysfs*14 | 4                  | AACTGGTCTGAGTGGT     | GCACCAAACCACTGCTGGGT |
|                                       | 5                  | GCCTTTCTCTTCCTCACCT  | CTCAGGAGGCTTTAGCTGGA |
|                                       | 6                  | GTCTGATCCGAGGAGGTGAG | GTCTCGAGTAAGGGTCCACC |
|                                       | T3                 | GCCTTTCTCTTCCTCACCT  | CTCAGGAGGCTTTAGCTGGA |
| c.2023G>A p.Val675Ile                 | 7                  | TGCTTCAGGGCTAACATGGA | TGCATTGGAGACACCCTGAT |
| c.6148G>C p.Val2050Leu                | 8                  | AGGCTGAAGTCCATTTCCCA | TTGGTTAAGCCCTTGGTGC  |
|                                       | 9                  | AGGCTGAAGTCCATTTCCCA | TTGGTTAAGCCCTTGGTGC  |

**Table S2.** *In silico* analysis of potential off-targets for sgRNA2 and sgRNA6.

| sgRNA  | DNA sequence <sup>a</sup> | Chr   | Position  | Strand | Mismatches | Locus type              | Splicing alteration prediction |          |
|--------|---------------------------|-------|-----------|--------|------------|-------------------------|--------------------------------|----------|
|        |                           |       |           |        |            |                         | Donor                          | Acceptor |
| sgRNA2 | TTCgTCAGGTGTcaGGACTCGGG   | chr1  | 3143299   | +      | 3          | <i>PRDM16</i> intron 1  | 4/4                            | 2/4      |
|        | TTCTTCAGGTGTGtGGACaaGGG   | chr1  | 19313503  | +      | 3          | <i>SLC66A1</i> intron 1 | 4/4                            | 1/4      |
|        | cTCTTCAGGgGTGCaGACTCAGG   | chr3  | 25324476  | -      | 3          | <i>RARB</i> intron 5    | 0/4                            | 0/4      |
|        | TTCcTCAGtTGTGCGGAgTCAGG   | chr9  | 126203473 | +      | 3          | Intergenic              | -                              | -        |
|        | TTCTTCAGtTGTaCtGACTCTGG*  | chr12 | 80295911  | -      | 3          | <i>OTOGL</i> intron 31  | -                              | -        |
|        | TTCTTCaaGTcTGCaGACTCAGG   | chr22 | 22363162  | +      | 3          | Intergenic              | -                              | -        |
|        | TcaTTCAGGTGTGaGGACTCTGG*  | chr22 | 46361593  | +      | 3          | <i>CELSR1</i> exon 35   | -                              | -        |
| sgRNA6 | GCATcCAGAGAAAGCTaTGTAGG*  | chr1  | 112903490 | -      | 2          | Intergenic              | -                              | -        |
|        | GCcTGgAGAGAAAiCTGTGTTGG   | chr1  | 32346517  | +      | 3          | Intergenic              | -                              | -        |
|        | tCATGCAGAGccAGCTGTGTGGG   | chr1  | 69061899  | -      | 3          | Intergenic              | -                              | -        |
|        | GCATGCAGAGgAgGCTtTGTAGG*  | chr1  | 170663322 | -      | 3          | <i>PRRX1</i> exon 1     | -                              | -        |
|        | GaATGCAGAGAAgGCTtTGTGGG*  | chr1  | 183127284 | +      | 3          | <i>LAMC1</i> exon 17    | -                              | -        |
|        | GtATGCAGAGAAAGtTGgGTGGG   | chr2  | 27885125  | -      | 3          | <i>RBKS</i> intron 1    | 0/4                            | 0/4      |
|        | GCATGCAGAGccAGCTGTGcAGG   | chr2  | 33616987  | +      | 3          | Intergenic              | -                              | -        |
|        | GCATGCaAcAGAgAGCaGTGTGGG  | chr2  | 129908581 | +      | 3          | Intergenic              | -                              | -        |
|        | tCATGCAGAGccAGCTGTGTGGG   | chr2  | 133878772 | +      | 3          | Intergenic              | -                              | -        |
|        | tCATGCAGAGccAGCTGTGTGGG   | chr3  | 30145653  | -      | 3          | Intergenic              | -                              | -        |
|        | tCATGCAGAGccAGCTGTGTGGG   | chr3  | 161637539 | +      | 3          | Intergenic              | -                              | -        |
|        | tCATGCAGAGccAGCTGTGTGGG   | chr4  | 99023883  | +      | 3          | <i>METAP1</i> intron 1  | 3/4                            | 3/4      |
|        | tCATGCAGAGccAGCTGTGTGGG   | chr5  | 37661519  | +      | 3          | <i>WDR70</i> intron 10  | 0/4                            | 0/4      |
|        | tCATGCAGAGtcAGCTGTGTGGG   | chr5  | 113221881 | -      | 3          | <i>MCC</i> intron 1     | 1/4                            | 2/4      |
|        | GCATGCAGAGAAAGCTGgtgTGG   | chr5  | 175897659 | +      | 3          | Intergenic              | -                              | -        |
|        | aCATGCAGiGAAAGCTGTGgAGG*  | chr6  | 72272584  | -      | 3          | <i>RIMS1</i> intron 22  | -                              | -        |
|        | tCATGCAGAGccAGCTGTGTGGG   | chr6  | 131862447 | +      | 3          | <i>ENPP1</i> intron 9   | 0/4                            | 0/4      |
|        | GCATGCiGAGAAAGCaaTGTAGG   | chr6  | 150787396 | -      | 3          | <i>PLEKHG1</i> intron 5 | 2/4                            | 4/4      |
|        | GCATGCaaAGAAAiCTGTGaTGG   | chr7  | 14774828  | -      | 3          | <i>DGKB</i> intron 2    | 0/0                            | 0/0      |
|        | tCAcGCAGAGAcAGCTGTGTAGG   | chr7  | 20053553  | -      | 3          | Intergenic              | -                              | -        |
|        | tCATGCAGAGccAGCTGTGTGGG   | chr7  | 25248655  | -      | 3          | Intergenic              | -                              | -        |
|        | tCATGCAGAGccAGCTGTGTGGG   | chr7  | 44988748  | +      | 3          | Intergenic              | -                              | -        |
|        | GCATGgAGAGActGCTGTGTGGG   | chr7  | 69229227  | +      | 3          | Intergenic              | -                              | -        |
|        | tCATGCAGAGccAGCTGTGTGGG   | chr7  | 68980776  | -      | 3          | Intergenic              | -                              | -        |

|                           |       |           |   |   |                  |     |     |
|---------------------------|-------|-----------|---|---|------------------|-----|-----|
| tCATGCAGAGccAGCTGTGTGGG   | chr7  | 73391450  | - | 3 | Intergenic       | -   | -   |
| GCATGCAGAGcAgGCTGTGcAGG   | chr7  | 128259702 | + | 3 | Intergenic       | -   | -   |
| caATGCAGAAaAAAGCTGTGTTGG  | chr7  | 140190082 | + | 3 | Intergenic       | -   | -   |
| GCATiCAGAGAAAAGCTcTcTGGG  | chr8  | 23471730  | + | 3 | Intergenic       | -   | -   |
| tCATGCAGAGccAGCTGTGTGGG   | chr8  | 57401196  | - | 3 | Intergenic       | -   | -   |
| cCATGCAGAGAAAAGCTtTGaAGG* | chr8  | 79763025  | + | 3 | HEY1 exon 5      | -   | -   |
| atATGCAGAGAAAGCcGTGTGGG   | chr8  | 97697883  | + | 3 | MTDH intron 6    | 3/4 | 0/4 |
| tCATGCAGAGccAGCTGTGTGGG   | chr9  | 73872853  | - | 3 | Intergenic       | -   | -   |
| GCATGCACAggAAGCTGgGTGGG   | chr9  | 126564877 | - | 3 | Intergenic       | -   | -   |
| GCATGCiGAGAgAtCTGTGTGGG   | chr10 | 13423675  | + | 3 | Intergenic       | -   | -   |
| GCATGCAGAAAgAGCTGTcTTGG   | chr11 | 19738132  | + | 3 | NAV2 intron 1    | 0/4 | 0/4 |
| tCATGCAGAGAAgtCTGTGTGGG   | chr11 | 83424208  | - | 3 | Intergenic       | -   | -   |
| tCATGCAGAGgcAGCTGTGTGGG   | chr12 | 9633829   | - | 3 | Intergenic       | -   | -   |
| tCATGCAGAGtcAGCTGTGTGGG   | chr12 | 15037314  | + | 3 | Intergenic       | -   | -   |
| tCATGCAGAGccAGCTGTGTGGG   | chr12 | 39544035  | + | 3 | Intergenic       | -   | -   |
| tCATGCAGAGtcAGCTGTGTGGG   | chr12 | 46218679  | + | 3 | SLC38A1 intron 5 | 0/4 | 2/4 |
| tCATGCAGAGccAGCTGTGTGGG   | chr12 | 101865652 | + | 3 | Intergenic       | -   | -   |
| GCAaGAgAGAGAAAGCTGaGTTGG  | chr13 | 23990943  | + | 3 | SPATA13 intron 2 | 0/4 | 3/4 |
| tCATGCAGAGtcAGCTGTGTGGG   | chr13 | 66184877  | + | 3 | Intergenic       | -   | -   |
| tCATGCAGAGccAGCTGTGTGGG   | chr15 | 26091192  | + | 3 | Intergenic       | -   | -   |
| GCcTGCAGgGgAAGCTGTGTGGG   | chr15 | 45473248  | - | 3 | Intergenic       | -   | -   |
| tCATGCAGAGccAGCTGTGTGGG   | chr15 | 75167813  | + | 3 | Intergenic       | -   | -   |
| tCATGCAGAGccAGCTGTGTGGG   | chr16 | 83153087  | + | 3 | CDH13 intron 5   | 0/4 | 0/4 |
| GCgTiCAGAGAAgGCTGTGTAGG   | chr19 | 39278607  | - | 3 | Intergenic       | -   | -   |
| GCATGCAGAGAAAaCTcTcTGGG   | chr20 | 727292    | + | 3 | Intergenic       | -   | -   |
| tCATGCAGAGccAGCTGTGTGGG   | chr20 | 45444649  | + | 3 | Intergenic       | -   | -   |
| GgATGCAGtGAAAGCaGTGTGGG   | chr21 | 43335686  | + | 3 | Intergenic       | -   | -   |
| GtATGCAGAGAAAaCTGTcTGGG   | chr22 | 42898195  | - | 3 | PACSIN2 intron 2 | 0/4 | 0/4 |
| GCAgGCAGAGAgAGCTGTGcAGG   | chrX  | 24453027  | - | 3 | Intergenic       | -   | -   |
| tCATGCAGAGccAGCTGTGTGGG   | chrX  | 44550392  | - | 3 | Intergenic       | -   | -   |
| tCATGCAGAGccAGCTGTGTGGG   | chrX  | 121961995 | + | 3 | Intergenic       | -   | -   |
| GCAgcCAGAGAAAAGCTGTGgAGG  | chrX  | 153652105 | + | 3 | Intergenic       | -   | -   |
| tCATGCAGAGtcAGCTGTGTGGG   | chrY  | 11886966  | - | 3 | Intergenic       | -   | -   |

<sup>a</sup>Asterisk indicates selected off-targets for Sanger sequencing



**Table S3.** List of primers for selected off-targets genotyping.

| <b>Off-target ID</b> | <b>Primer sequence</b> |                          | <b>Amplicon (bp)</b> |
|----------------------|------------------------|--------------------------|----------------------|
| OT-1                 | Forward                | ATGGTAAGTATATGAGTTGATGAG | 298                  |
|                      | Reverse                | ATGACACACTTCCACCTCCAG    |                      |
| OT-2                 | Forward                | AGTGATCAGCACAGCTGCTTC    | 307                  |
|                      | Reverse                | CCTTTTCGTA CTTAGGAAACGC  |                      |
| OT-3                 | Forward                | TTAGGGTCCTCATCATGCTATG   | 331                  |
|                      | Reverse                | GTGAACTTCTTGAGATGAGAGG   |                      |
| OT-4                 | Forward                | ATTAGCAGCCATCTAAACCTATG  | 487                  |
|                      | Reverse                | AGGAGTTTGTCTTGATCCTGAG   |                      |
| OT-5                 | Forward                | AGGAAGAAGGAGATTGTGATGG   | 284                  |
|                      | Reverse                | AGTCCGACGGAGGGTGCTG      |                      |
| OT-6                 | Forward                | TATGACAGTATAGTCAGCTTATAG | 418                  |
|                      | Reverse                | TGGAACATAAGTCTTTAAGAACAG |                      |
| OT-7                 | Forward                | TCGTTGTATCCACTGTATGTGG   | 419                  |
|                      | Reverse                | GACAGCATTTTCTACATTAAGGTA |                      |
